# Supplementary material for: The Complementarity Principle—One More Step towards Analytical Docking on the Example of Dihydrofolate Reductase Complexes
Source: MDPI journal article supplement (doi:10.3390/life11090983), 2021-09-19
Supplement: s1 [file s1]

## Article

# The Complementarity Principle—One More Step towards Analytical Docking on the Example of Dihydrofolate Reductase Complexes

Vladimir Potemkin \*, Maria Grishina \*

Laboratory of Computational Modelling of Drugs, South Ural State University, 454080 Chelyabinsk, Russia

\* Correspondence: potemkinva@susu.ru (V.P.); grishinama@susu.ru (M.G.)

## Supplementary materials

**Table S1.** *a*- and *b*- parameters, squared correlation coefficients (R<sup>2</sup>), standard error of estimate (Sigma), number of points (Npoints) of the dependencies (12) for CF1, CF2 and CF3 complementarity factors determined in the zones of intermolecular contacts (with  $\rho_E > 0.001$  a.u. and  $\rho_L > 0.001$  a.u.) and in the ligand zone (with  $\rho_L > 0.001$  a.u.) for complexes without hydrogens.

| zones of intermolecular contacts |         |         |         |                |        | The ligand zone |         |                |        |
|----------------------------------|---------|---------|---------|----------------|--------|-----------------|---------|----------------|--------|
|                                  |         | a       | b       | R <sup>2</sup> | Sigma  | a               | b       | R <sup>2</sup> | Sigma  |
| 1boz                             | CF1     | 5.0515  | -3.5988 | 0.8763         | 0.3901 | 4.9217          | -3.6335 | 0.9074         | 0.6732 |
|                                  | CF2     | 5.2442  | -3.4449 | 0.8853         | 0.3579 | 5.4462          | -3.5799 | 0.9015         | 0.6862 |
|                                  | CF3     | 0.3796  | -2.9230 | 0.8747         | 0.3193 | 1.7106          | -3.3997 | 0.8691         | 0.7652 |
|                                  | Npoints | 7531    |         |                |        | 343105          |         |                |        |
| 1hfp                             | CF1     | 6.4343  | -3.9491 | 0.9513         | 0.2881 | 5.8690          | -3.8324 | 0.9478         | 0.6396 |
|                                  | CF2     | 6.5653  | -3.7843 | 0.9470         | 0.2887 | 6.3781          | -3.7783 | 0.9439         | 0.6552 |
|                                  | CF3     | 1.4782  | -3.2220 | 0.9055         | 0.3356 | 2.5821          | -3.5946 | 0.9207         | 0.7500 |
|                                  | Npoints | 12414   |         |                |        | 418670          |         |                |        |
| 1kms                             | CF1     | 5.3104  | -3.6297 | 0.9541         | 0.2388 | 4.4625          | -3.4882 | 0.9373         | 0.5112 |
|                                  | CF2     | 5.2777  | -3.4123 | 0.9487         | 0.2380 | 4.8976          | -3.4103 | 0.9316         | 0.5236 |
|                                  | CF3     | -0.3443 | -2.6771 | 0.8854         | 0.2888 | 0.8583          | -3.1474 | 0.8979         | 0.6015 |
|                                  | Npoints | 12606   |         |                |        | 336873          |         |                |        |
| 3ghc                             | CF1     | 6.2702  | -3.9250 | 0.9462         | 0.3103 | 5.5578          | -3.7759 | 0.9249         | 0.6655 |
|                                  | CF2     | 5.2747  | -3.3954 | 0.9323         | 0.3032 | 6.0782          | -3.7049 | 0.9228         | 0.6624 |
|                                  | CF3     | 0.0662  | -2.8138 | 0.8867         | 0.3333 | 2.1147          | -3.4850 | 0.8889         | 0.7617 |
|                                  | Npoints | 16398   |         |                |        | 452695          |         |                |        |
| 3gi2                             | CF1     | 6.2361  | -3.9198 | 0.9462         | 0.3074 | 5.0877          | -3.6479 | 0.9232         | 0.5965 |
|                                  | CF2     | 5.2838  | -3.4014 | 0.9323         | 0.3014 | 5.4557          | -3.5387 | 0.9250         | 0.5715 |
|                                  | CF3     | 0.1414  | -2.8396 | 0.8849         | 0.3369 | 1.2559          | -3.2601 | 0.8916         | 0.6445 |
|                                  | Npoints | 18925   |         |                |        | 436741          |         |                |        |
| 3ntz                             | CF1     | 5.8369  | -3.8037 | 0.9271         | 0.3110 | 5.3645          | -3.7168 | 0.9315         | 0.6765 |
|                                  | CF2     | 4.5652  | -3.1928 | 0.9161         | 0.2818 | 6.0983          | -3.7047 | 0.9281         | 0.6920 |
|                                  | CF3     | -0.4610 | -2.6594 | 0.8723         | 0.2966 | 2.4020          | -3.5440 | 0.8990         | 0.7973 |
|                                  | Npoints | 14983   |         |                |        | 468184          |         |                |        |
| 3nu0                             | CF1     | 6.3647  | -3.9617 | 0.9500         | 0.2905 | 5.2029          | -3.6938 | 0.9147         | 0.7098 |
|                                  | CF2     | 5.2090  | -3.3818 | 0.9365         | 0.2815 | 5.8742          | -3.6684 | 0.9079         | 0.7349 |
|                                  | CF3     | 0.2509  | -2.8741 | 0.9035         | 0.3002 | 2.0621          | -3.4820 | 0.8667         | 0.8591 |
|                                  | Npoints | 15595   |         |                |        | 480706          |         |                |        |
| 4kfj                             | CF1     | 5.5122  | -3.6939 | 0.9123         | 0.3145 | 5.1904          | -3.6895 | 0.9517         | 0.5722 |
|                                  | CF2     | 5.8686  | -3.5780 | 0.9117         | 0.3058 | 5.6936          | -3.6223 | 0.9447         | 0.6038 |
|                                  | CF3     | 1.5949  | -3.1957 | 0.8461         | 0.3743 | 2.1728          | -3.4754 | 0.9211         | 0.7008 |
|                                  | Npoints | 20129   |         |                |        | 430975          |         |                |        |
| 4qhv                             | CF1     | 5.1875  | -3.5992 | 0.9514         | 0.2906 | 4.5604          | -3.5238 | 0.9306         | 0.5633 |
|                                  | CF2     | 5.5656  | -3.4991 | 0.9497         | 0.2875 | 5.0826          | -3.4660 | 0.9262         | 0.5727 |
|                                  | CF3     | 1.2950  | -3.1494 | 0.9178         | 0.3367 | 1.3370          | -3.2712 | 0.9000         | 0.6384 |
|                                  | Npoints | 12787   |         |                |        | 320736          |         |                |        |

**Table S2.** Squared correlation coefficient (R2), standard error of the estimate (Sigma), maximal values (maxCF) of CF1, CF2, CF3 complementarity factors, *a*- and *b*-parameters of the eqs. (14)–(16) for complexes with hydrogens.

| name |         | zones of intermolecular contacts |          |        |        | the ligand zone |          |        |        |
|------|---------|----------------------------------|----------|--------|--------|-----------------|----------|--------|--------|
|      |         | <i>a</i>                         | <i>b</i> | R2     | Sigma  | <i>a</i>        | <i>b</i> | R2     | Sigma  |
| 1boz | CF1     | 2.0491                           | -2.7789  | 0.7924 | 0.5833 | 3.1855          | -3.3033  | 0.8872 | 0.7693 |
|      | CF2     | 1.3253                           | -2.4286  | 0.6493 | 0.7320 | 2.8139          | -3.1026  | 0.8243 | 0.9356 |
|      | CF3     | 3.7025                           | -3.6901  | 0.9548 | 0.3292 | 3.7431          | -3.7490  | 0.9600 | 0.4997 |
|      | Npoints | 57046                            |          |        |        | 425086          |          |        |        |
| 1hfp | CF1     | 3.1851                           | -3.1347  | 0.8070 | 0.6016 | 4.1803          | -3.5511  | 0.9255 | 0.7851 |
|      | CF2     | 2.7512                           | -2.8760  | 0.7022 | 0.7350 | 4.0433          | -3.4132  | 0.8885 | 0.9424 |
|      | CF3     | 3.6636                           | -3.6902  | 0.9385 | 0.3707 | 3.8843          | -3.7838  | 0.9719 | 0.5010 |
|      | Npoints | 72436                            |          |        |        | 505187          |          |        |        |
| 1kms | CF1     | 2.7818                           | -3.0011  | 0.8414 | 0.5675 | 3.0402          | -3.1793  | 0.9140 | 0.6634 |
|      | CF2     | 2.2445                           | -2.7089  | 0.7303 | 0.7169 | 2.6652          | -2.9603  | 0.8561 | 0.8259 |
|      | CF3     | 3.4784                           | -3.6066  | 0.9612 | 0.3154 | 3.3369          | -3.5826  | 0.9714 | 0.4185 |
|      | Npoints | 71166                            |          |        |        | 405154          |          |        |        |
| 3ghc | CF1     | 3.5934                           | -3.2958  | 0.8516 | 0.6156 | 3.7625          | -3.4268  | 0.8923 | 0.7712 |
|      | CF2     | 2.7546                           | -2.8647  | 0.7604 | 0.7195 | 3.4974          | -3.2268  | 0.8402 | 0.9115 |
|      | CF3     | 3.7244                           | -3.7231  | 0.9534 | 0.3684 | 3.6796          | -3.7204  | 0.9603 | 0.4901 |
|      | Npoints | 93878                            |          |        |        | 532127          |          |        |        |
| 3gi2 | CF1     | 3.3654                           | -3.2029  | 0.8462 | 0.5825 | 3.5873          | -3.3431  | 0.8993 | 0.7044 |
|      | CF2     | 2.5859                           | -2.7935  | 0.7492 | 0.6895 | 3.2013          | -3.0995  | 0.8525 | 0.8115 |
|      | CF3     | 3.4937                           | -3.6501  | 0.9480 | 0.3646 | 3.4793          | -3.6474  | 0.9605 | 0.4653 |
|      | Npoints | 98969                            |          |        |        | 509414          |          |        |        |
| 3ntz | CF1     | 2.3359                           | -2.8732  | 0.8213 | 0.5817 | 3.5878          | -3.3905  | 0.9144 | 0.8178 |
|      | CF2     | 1.2313                           | -2.3615  | 0.6757 | 0.7101 | 3.3839          | -3.2207  | 0.8660 | 0.9990 |
|      | CF3     | 3.5825                           | -3.6657  | 0.9536 | 0.3510 | 3.8201          | -3.7676  | 0.9706 | 0.5168 |
|      | Npoints | 80161                            |          |        |        | 547510          |          |        |        |
| 3nu0 | CF1     | 2.9333                           | -3.0580  | 0.8235 | 0.5812 | 3.5702          | -3.3755  | 0.9086 | 0.7674 |
|      | CF2     | 1.9739                           | -2.5978  | 0.6932 | 0.7096 | 3.3200          | -3.1911  | 0.8578 | 0.9315 |
|      | CF3     | 3.6475                           | -3.6784  | 0.9463 | 0.3599 | 3.8003          | -3.7571  | 0.9632 | 0.5267 |
|      | Npoints | 89037                            |          |        |        | 562141          |          |        |        |
| 4kfj | CF1     | 2.1146                           | -2.7442  | 0.7431 | 0.6200 | 3.6902          | -3.4337  | 0.9105 | 0.7775 |
|      | CF2     | 1.4593                           | -2.3955  | 0.5765 | 0.7889 | 3.4566          | -3.2626  | 0.8571 | 0.9623 |
|      | CF3     | 3.4639                           | -3.6018  | 0.9444 | 0.3358 | 3.5617          | -3.6757  | 0.9680 | 0.4827 |
|      | Npoints | 80045                            |          |        |        | 528073          |          |        |        |
| 4qhv | CF1     | 2.6660                           | -2.9614  | 0.7650 | 0.6333 | 3.4879          | -3.3546  | 0.8964 | 0.7177 |
|      | CF2     | 2.1401                           | -2.6716  | 0.6355 | 0.7806 | 3.2569          | -3.1860  | 0.8402 | 0.8747 |
|      | CF3     | 3.4287                           | -3.5815  | 0.9414 | 0.3449 | 3.5780          | -3.6749  | 0.9586 | 0.4806 |
|      | Npoints | 77735                            |          |        |        | 404355          |          |        |        |

**Table S3.** The negative decimal logarithm of the inhibitory concentrations (pIC<sub>50</sub>) of 8 ligands [23–29].

| <b>ligand</b> | <b>pIC<sub>50</sub> (IC<sub>50</sub> is measured in mol/l)</b> |
|---------------|----------------------------------------------------------------|
| 1boz          | 5.07                                                           |
| 1hfp          | 6.66                                                           |
| 1kms          | No found IC <sub>50</sub> values for human DHFR                |
| 3ghc          | 7.72                                                           |
| 3gi2          | 7.70                                                           |
| 3ntz          | 7.05                                                           |
| 3nu0          | 7.00                                                           |
| 4kfj          | 7.22                                                           |
| 4qhv          | 7.28                                                           |
